# Supplementary material for: Cross-platform validation of a mouse blood gene signature for quantitative reconstruction of radiation dose
Source: PubMed Central journal article supplement (PMC9391341; doi:10.1038/s41598-022-18558-1), 2022-08-19
Supplement: 41598_2022_18558_MOESM4_ESM.pdf [file 41598_2022_18558_MOESM4_ESM.pdf]

**Cross-platform validation of a mouse blood gene signature for quantitative reconstruction of radiation dose**

Shanaz A. Gandhi\*, Igor Shuryak, Brian Ponnaiya, Xuefeng Wu, Guy Garty, Shad R. Morton, Salan P. Kaur and Sally A. Amundson

## B cells

Coefficients:

|             | Value     | Std.Error | t-value   | p-value |
|-------------|-----------|-----------|-----------|---------|
| (Intercept) | 5.431439  | 0.2449634 | 22.172452 | 0.0000  |
| Dose        | -0.661612 | 0.0670307 | -9.870276 | 0.0000  |
| Sex         | -0.454254 | 0.3451976 | -1.315925 | 0.1928  |
| Sex_Dose    | 0.110583  | 0.0917816 | 1.204850  | 0.2326  |

## T cells

Coefficients:

|             | Value     | Std.Error  | t-value   | p-value |
|-------------|-----------|------------|-----------|---------|
| (Intercept) | 6.038787  | 0.14741720 | 40.96393  | 0.0000  |
| Dose        | -0.539373 | 0.04852854 | -11.11455 | 0.0000  |
| Sex         | -0.400618 | 0.21230775 | -1.88697  | 0.0636  |
| Sex_Dose    | 0.076703  | 0.06827473 | 1.12345   | 0.2653  |

**Supplementary Fig1A** Comparison of B and T cell counts after radiation, effects of dose and sex only and then dose and sex together. In both cases, p-values for Sex and Sex+Dose were not significant, p values >0.05

1B

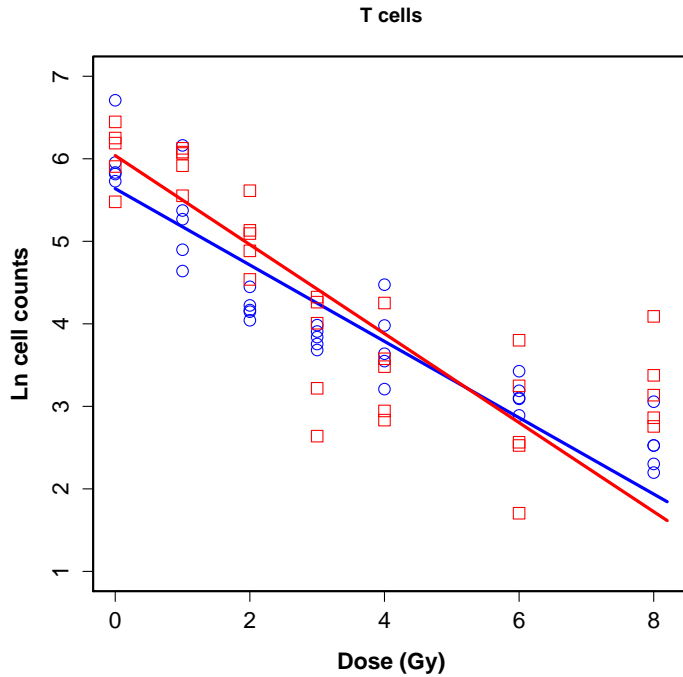

1C

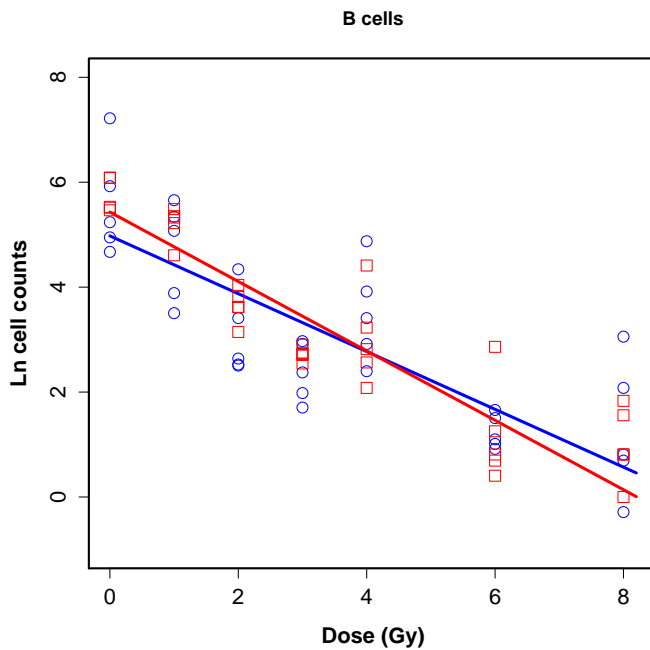

Graph shows individual data for each mouse.

**Blue = males**

**Red = females**

**Supplementary figures 1B and 1C** Comparison of B and T cell counts after radiation, effects of dose and sex only and then dose and sex together. In both cases, p-values for Sex and Sex+Dose were not significant, p values >0.05

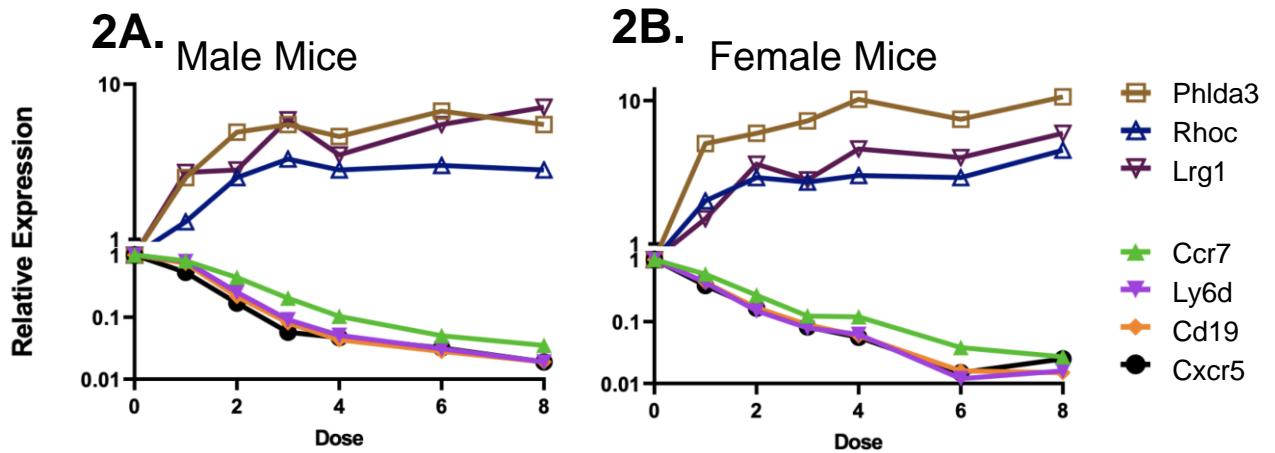

**Supplementary figures 2** Relative gene expression fold changes of 7 signature mRNA by qRT-PCR, dose vs sham calibrator (using geometric mean of Actb and Gapdh housekeeping genes), n=5 males (**2A**) and n=5 females (**2B**).

**3A.**

$$0.1016x^2 - 0.8844x + 2.053$$

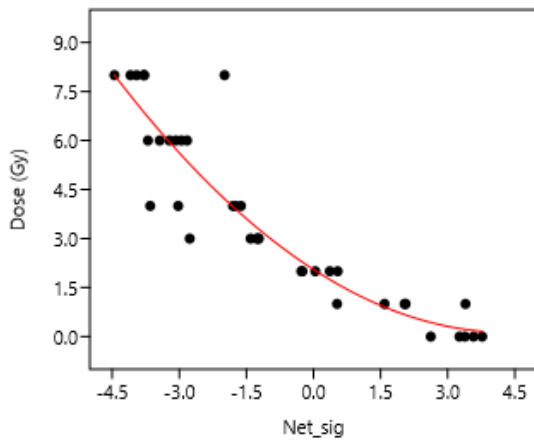**3B.**

$$0.05756x^2 - 0.8805x + 2.342$$

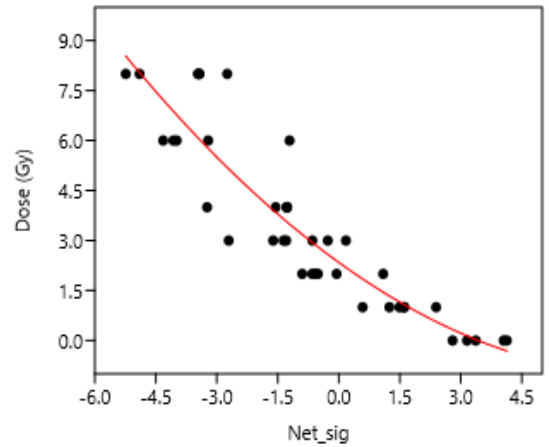**3C.**

Males

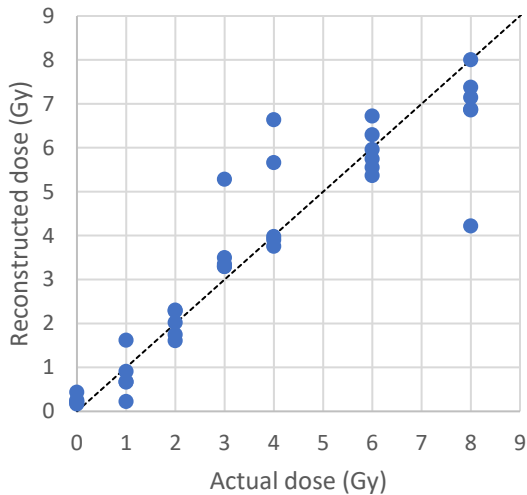**3D.**

Females

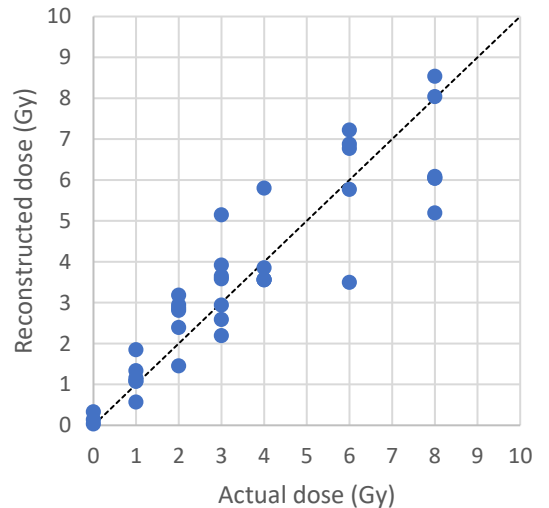

**Supplementary figures 3.** Male (**3A** and **3C**) gene expression results for dose reconstruction. **3A** plot Net\_sig (N) independent variable and dose as dependent variable in males, and equation for the regression line. **3C** plot of reconstructed dose vs actual dose delivered and fit line using the regression model. Female (**3B** and **3D**) gene expression results for dose reconstruction. **3B** plot Net\_sig (N) independent variable and dose as dependent variable in males, and equation for the regression line. **3D** plot of reconstructed dose vs actual dose delivered and fit line using the regression model.

#### 4A. Microarray 7genes average

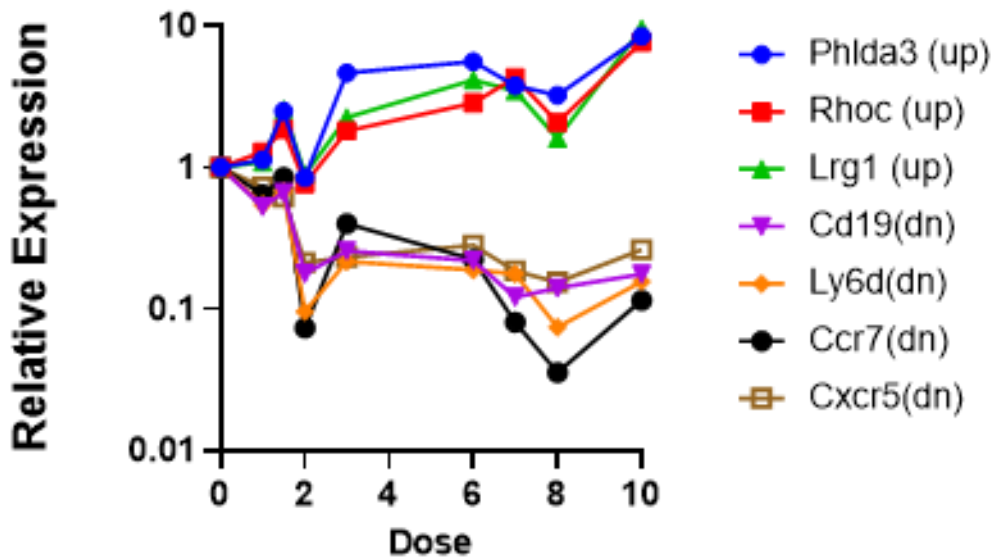

#### 4B. PCR 7genes average

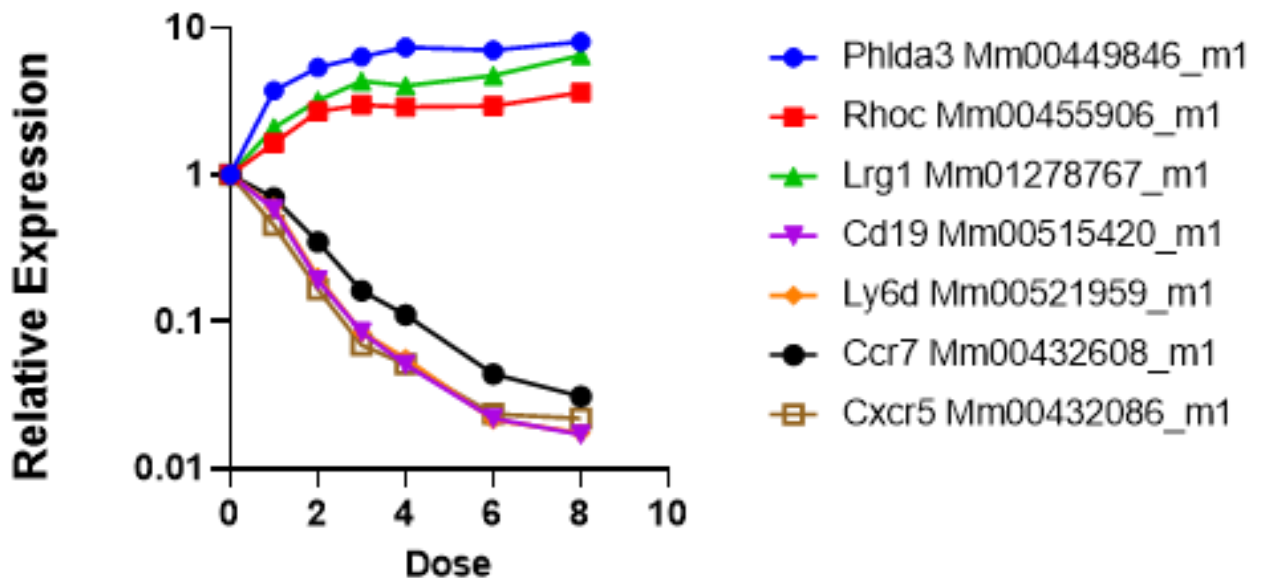

**Supplementary figures 4.** Relative gene expression curves, mean of n=10 (5 males and 5 females) for the 7mRNA signature genes, by microarray (**4A**) fold changes mean of irradiated vs sham, and qRT-PCR (**4B**) fold changes dose vs sham calibrator (using geomean of Actb and Gapdh housekeeping genes)
